# Supplementary material
Source: PubMed Central journal article supplement (PMC7958358)
Supplement: pnas.2015648118.sapp.pdf [file pnas.2015648118.sapp.pdf]

## Supplementary Information

### **Raf promotes dimerization of the Ras G-domain with increased allosteric connections**

Morgan R. Packer<sup>a,1</sup>, Jillian A. Parker<sup>a,1</sup>, Jean K. Chung<sup>b,2</sup>, Zhenlu Li<sup>c</sup>, Young Kwang Lee<sup>b,3</sup>, Trinity Cookis<sup>a</sup>, Hugo Guterres<sup>a</sup>, Steven Alvarez<sup>b,d</sup>, Md Amin Hossain<sup>a</sup>, Daniel P. Donnelly<sup>a</sup>, Jeffrey N. Agar<sup>a,e</sup>, Lee Makowski<sup>a,f</sup>, Matthias Buck<sup>c</sup>, Jay T. Groves<sup>b</sup> and Carla Mattos<sup>a,4</sup>

<sup>a</sup>Department of Chemistry and Chemical Biology, Northeastern University, 360 Huntington Ave, Boston, MA 02115.

<sup>b</sup>Department of Chemistry, University of California Berkeley, Berkeley, CA 94720.

<sup>c</sup>Department of Physiology and Biophysics, Case Western Reserve University, Cleveland, OH 44106.

<sup>d</sup>Department of Materials Science and Engineering, University of California Berkeley, Berkeley, CA 94720.

<sup>e</sup>Department of Pharmaceutical Sciences, Northeastern University, 360 Huntington Ave, Boston, MA 02115.

<sup>f</sup>Department of Bioengineering, Northeastern University, 360 Huntington Ave, Boston, MA 02115.

<sup>1</sup>These authors contributed equally to the project

<sup>2</sup>Present Address: Department of Chemistry, Colorado State University, Fort Collins, CO 80524.

<sup>3</sup>Present Address: Department of Chemistry and Biochemistry, San Diego State University, San Diego, CA 92182.

<sup>4</sup>To whom correspondence may be addressed. Email: [c.mattos@northeastern.edu](mailto:c.mattos@northeastern.edu)

### **This PDF file includes:**

Figures S1 to S10  
SI References

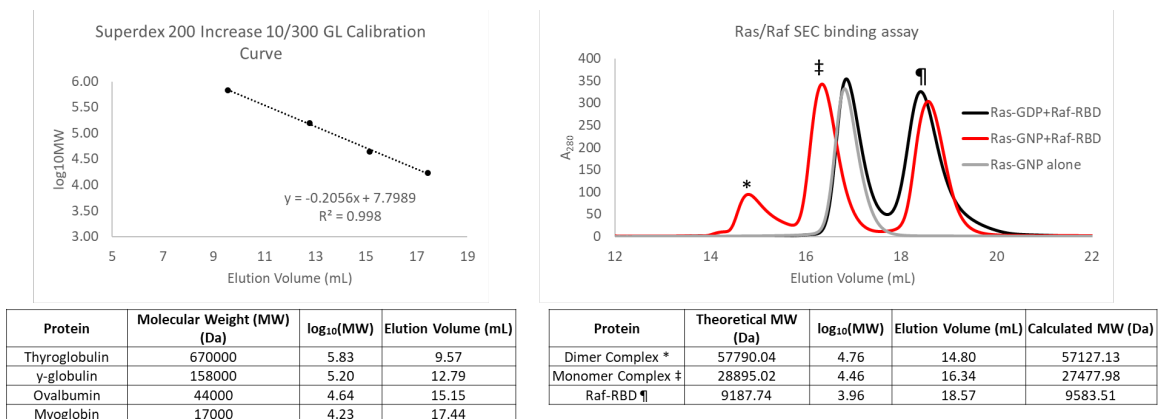

**Fig. S1.** Calculation of species molecular weight from SEC elution volume. A Superdex 200 Increase 10/300 GL gel filtration column (GE Healthcare Life Sciences) was used to achieve separation based on molecular weight of the species in solutions containing KRas and CRaf-RBD. A standard curve was constructed using a buffer system and protocol identical to those used in the KRas/Raf-RBD SEC experiment. The elution volumes of the peaks were applied to the calculated standard curve regression to obtain each peak's molecular weight, shown under the column labelled "Calculated MW (kDa)". The theoretical molecular weights were obtained from the known molecular weights of the truncated KRas G-domain and CRaf-RBD and shown in the "Theoretical MW (kDa)" column. The calculated and theoretical molecular weights of each species are in good agreement. The SEC run in red shows formation of the dimer (\*) when KRas is bound to the GTP analogue GppNHp (denoted as GNP) and in solution with Raf-RBD. SEC runs containing Ras-GDP and Raf-RBD (black) do not show the dimer peak, as Raf-RBD binds specifically to the GTP-bound form. Ras-GppNHp in the absence of Raf-RBD (gray) shows the monomer but not the dimer peak, attesting to the importance of Raf-RBD in dimerization.

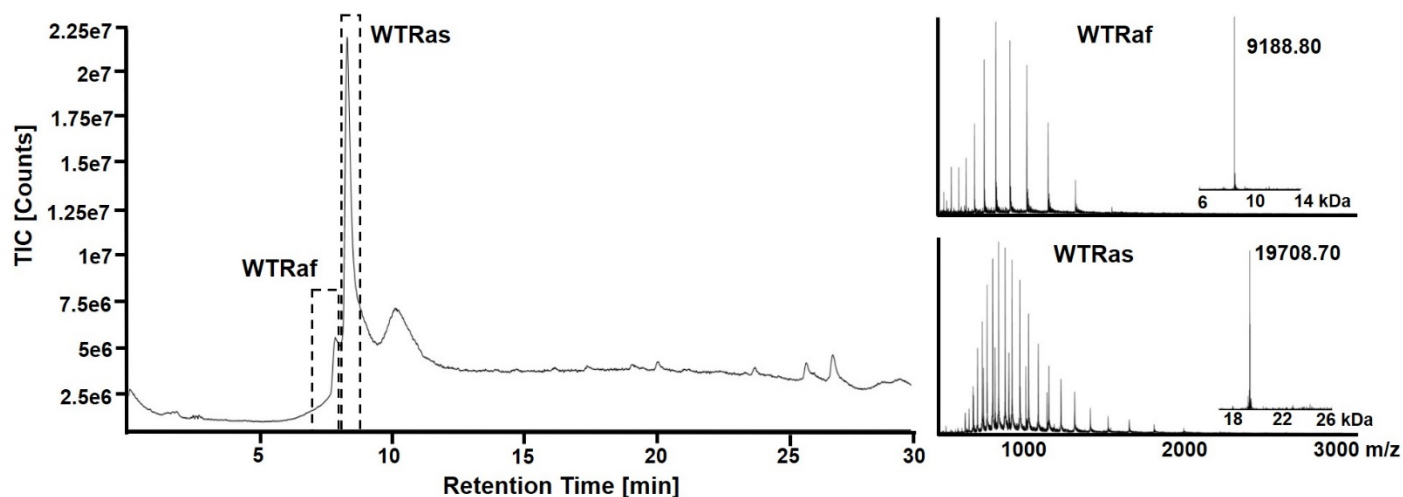

**Fig. S2.** Mass spectrometric analysis of the SEC eluent corresponding to the Ras/Raf-RBD complex dimer peak. Intact protein liquid chromatography-mass spectrometry (LC-MS) was performed using an H class Acquity Ultra High Pressure Liquid Chromatography (UPLC) system coupled with a Xevo G2-S Q-TOF mass spectrometer (Waters Corp, Milford, MA) as described in Donnelly, D.P. 2019 (1). Briefly, reversed phase chromatography was employed for separation (Acquity UPLC protein BEH C4 300 Å pore size, 1.7 µm particle size, 100 mm bed length, 2.1 mm ID x 100 mm) with 95% water/ 5% acetonitrile with 0.1% formic acid as solvent A and 95% acetonitrile/ 5 % water with 0.1% formic acid as solvent B. The reversed phase chromatogram is shown on the left and the mass spectra on the right. Within each mass spectrum is an inset showing the maximum entropy deconvolution of the time average spectrum, which are consistent with the theoretical molecular masses of Raf (top) and Ras (bottom). The third peak has the same mass as WT Ras-RBD, ruling out this peak arising from a disulfide bridged, or any other covalent linkage, multimer.

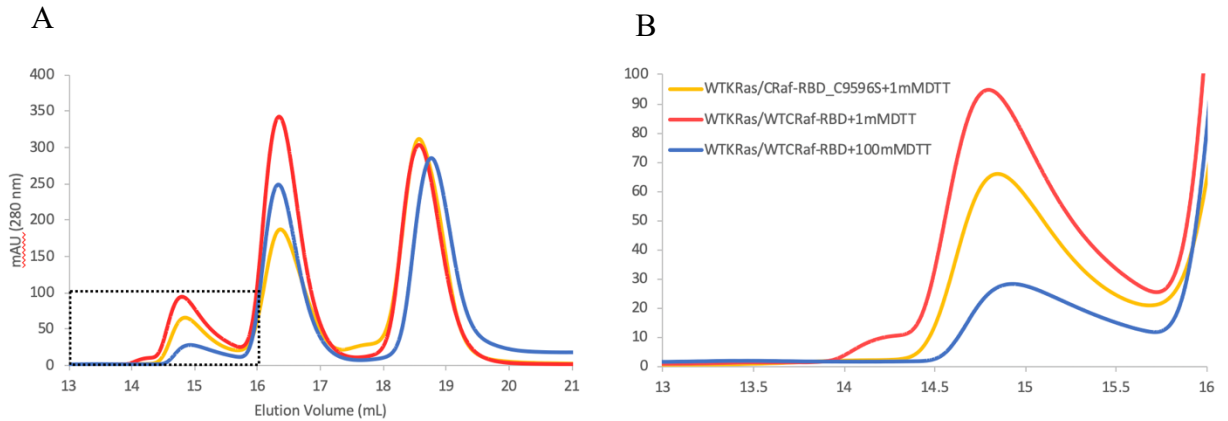

**Fig. S3.** SEC runs for KRas and Raf-RBD showing the presence of dimers without disulfide bonds. (A) Full run showing the expected peaks for the dimer of the KRas/Raf-RBD complex, the monomer of the KRas/Raf-RBD complex and Raf-RBD on a Superdex 200 Increase 10/300 GL gel filtration column (GE Healthcare Life Sciences). (B) Enlargement of the dimer peak, shown in the boxed section in A. The red curve is the same as shown in Fig. S1, which represents KRas and wild-type Raf-RBD in the presence of 1mM DTT. The yellow curve is for KRas and Raf double mutant C95S-C96S with 1mM DTT. The blue curve is for KRas and Raf-RBD in 100 mM DTT. There is variation in the relative amount of dimer present, as mentioned in the main text. Note the small peak of higher MW that appears before the dimer peak for the run using wild type Raf-RBD with 1 mM DTT (red curve). This peak is not present with either the Raf-RBD C95S-C96S double mutant in 1mM DTT or when 100 mM DTT is used with the wild type Raf-RBD, indicating that the high MW shoulder is likely due to disulfide bonds between exposed cysteine residues in the dimer forming larger order complexes.

### KRas/Raf SEC-SAXS chromatogram

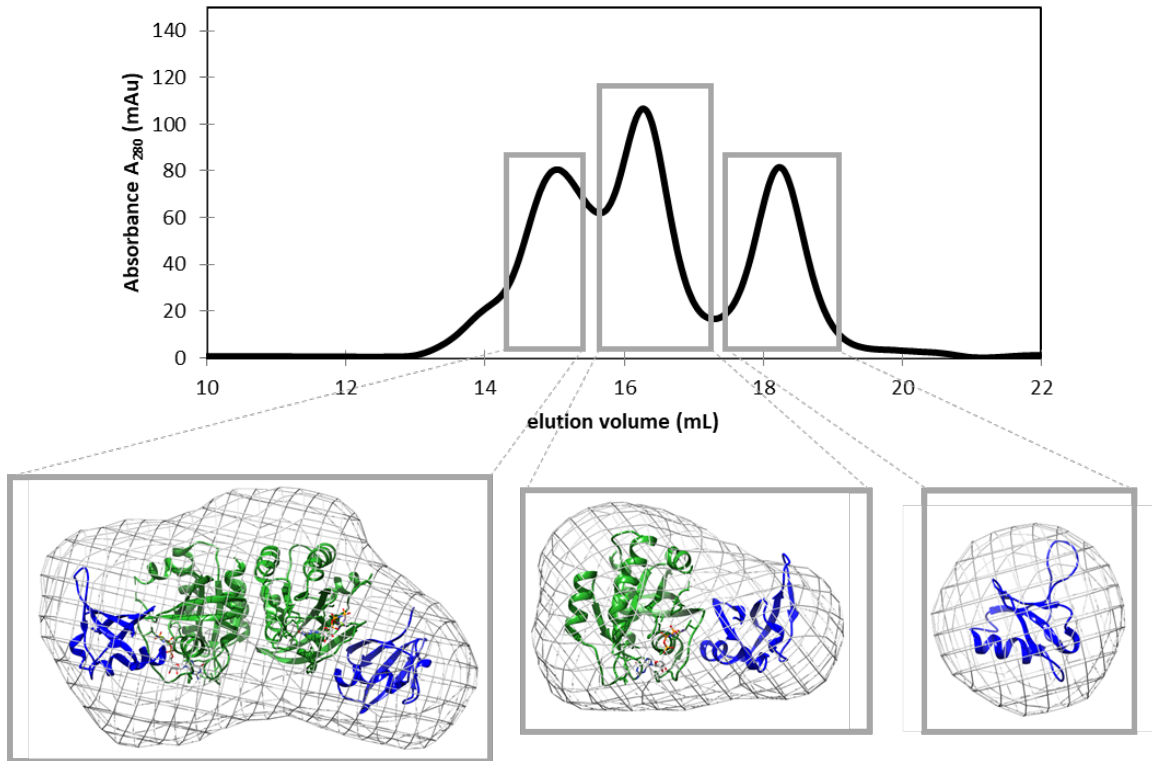

**Fig. S4.** Calculated envelopes of the three dominant species resulting from the SEC-SAXS experiment for KRas-GppNHp (truncated at residue 166) in the presence of excess Raf-RBD. The three major peaks eluting from a Superdex 10/300 Gel Filtration column (GE Healthcare Life Sciences) were subjected to in-line SAXS data collection and envelope reconstruction using BioXTAS RAW (2). SAXS data obtained from the peak corresponding to the dimer species has a calculated radius of gyration ( $R_g$ ) of 30 Å. The dimer of the complex obtained from our crystal structure of the HRas/CRAF-RBD complex (PDB ID 4G0N with a two-fold symmetry rotation axis applied to generate the dimer) fits the SAXS data with a  $\chi^2$  value of 1.24. The second species has an  $R_g$  of 21 Å, and the monomer of the HRas/CRAF-RBD complex (PDB ID: 4G0N) fits the data with a  $\chi^2$  value of 1.01. Raf-RBD alone (PDB ID 1RRB) has the smallest  $R_g$ , 13.3 Å, and calculated fit to the SAXS data with a  $\chi^2$  value of 0.92. The obtained  $\chi^2$  values are all within the range expected for excellent fit of the models to the data. Chi squared values of the theoretical model and experimental scattering correlations were calculated using the FoXS server (3).

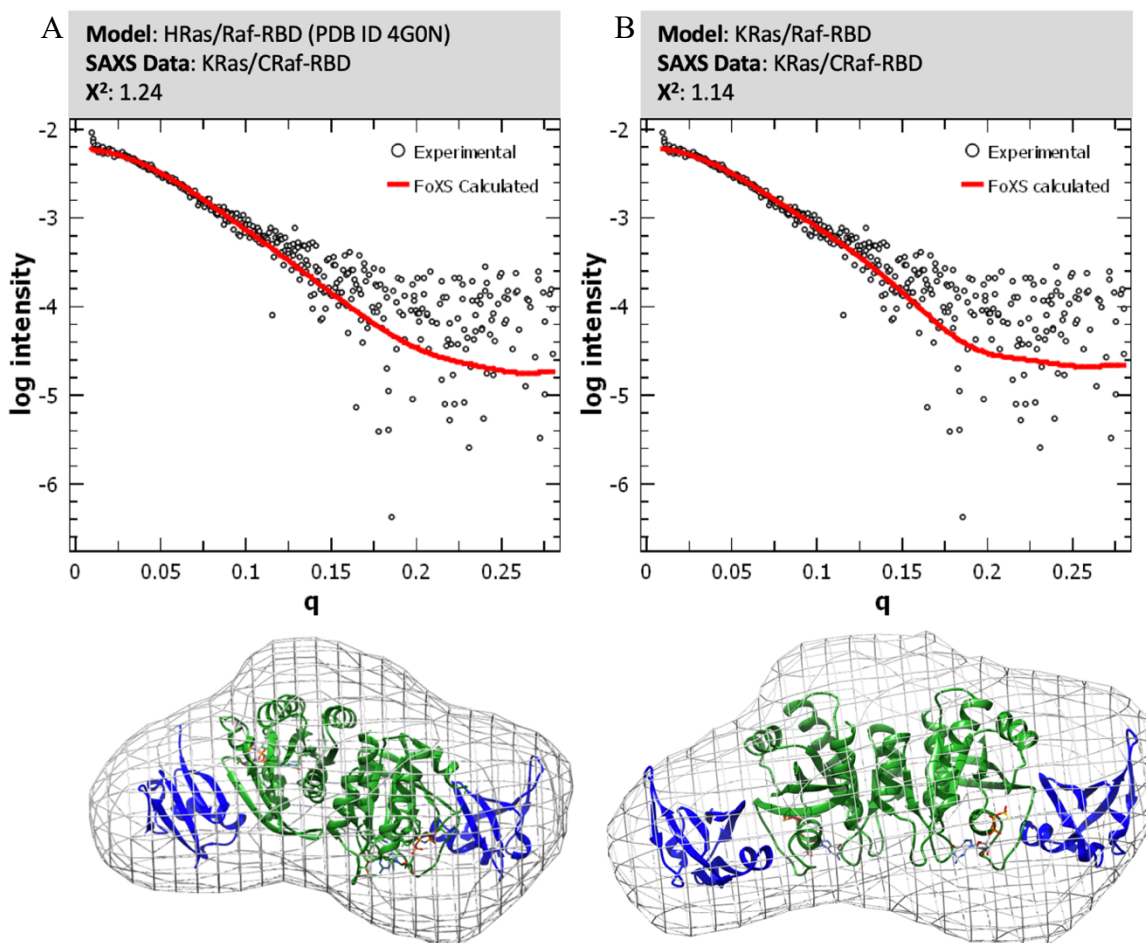

**Fig. S5.** Quantitative analysis of crystallographic and NMR-based dimer models against SAXS data using FOXS (3). The SAXS data used was that obtained for the dimer peak eluted from a SEC column (KRas was truncated at residue 166). FoXS generates a theoretical scattering curve from a given model (red on upper portion of the panels) and provides a match to the experimental SAXS data. The fit of the calculated scattering curve for the rigid model to the experimental X-ray scattering data is given by the  $\chi^2$  value, with values less than 2.0 indicative of a good fit. (A) The HRas/CRaf-RBD dimer model was generated from symmetry related molecules in the 4G0N crystal structure. (B) The KRas/Raf-RBD dimer model was obtained from an average of the top 20 NMR models published by Lee et al (4). The average was calculated using VMD (5). As this model does not include Raf-RBD, the Raf-RBD domain was placed in each monomer in this model via superposition on the HRas/Raf-RBD complex (PDB ID 4G0N). The resulting  $\chi^2$  values indicate excellent fits to the SAXS data for both models ( $\chi^2$  values  $< 1.5$ ).

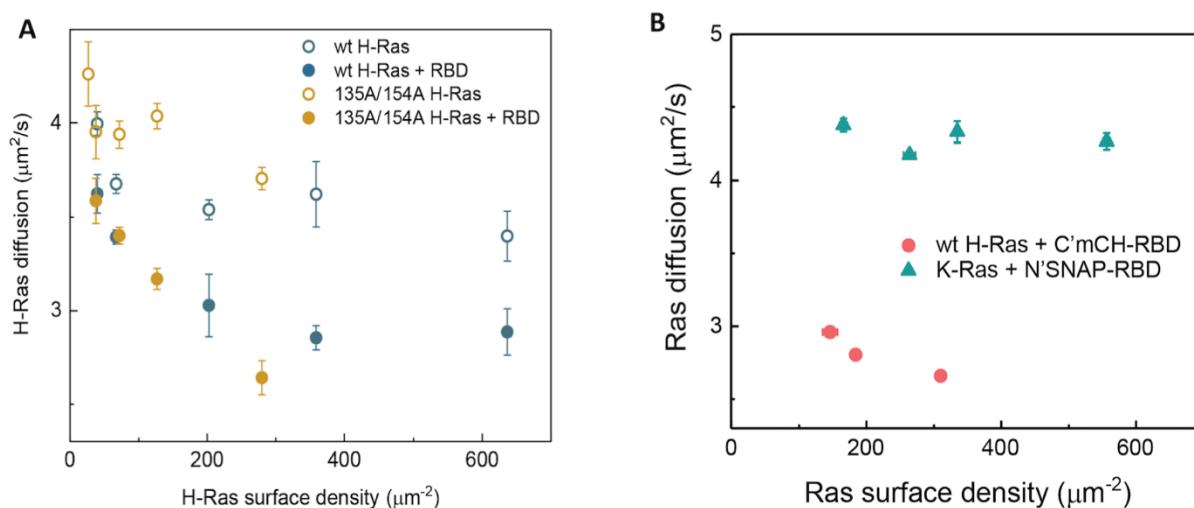

**Fig. S6.** Supported lipid bilayers experiments for Ras (A) FCS diffusion measurements for wild-type HRas and dimer interface mutant at the  $\alpha 4$ - $\alpha 5$  interface (R135A/D154A) with and without 250 nM Raf-RBD, showing identical complexation behavior. Interestingly, the double interface mutant HRas R135A/D154A has diffusion behavior identical to the wild type. This could be an indication that mutation of the two residues to the small alanine side chain is tolerated in the presence of the HVR and the membrane, given an otherwise intact Ras dimer interface. This behavior is contrary to that observed for the D154Q substitution shown to completely disrupt KRas dimerization *in vitro* and in cells (6) and for the R135E charge reversal substitution that disrupts Ras/Ras interactions measured by paramagnetic relaxation enhancement NMR (4), possibly due to steric hindrance from the bulky mutant side chains at the interface. (B) Modification of Raf-RBD results in different oligomerization behavior: mCherry at the C-terminus preserves the oligomerization, while SNAP tag at the N-terminus compromises it.



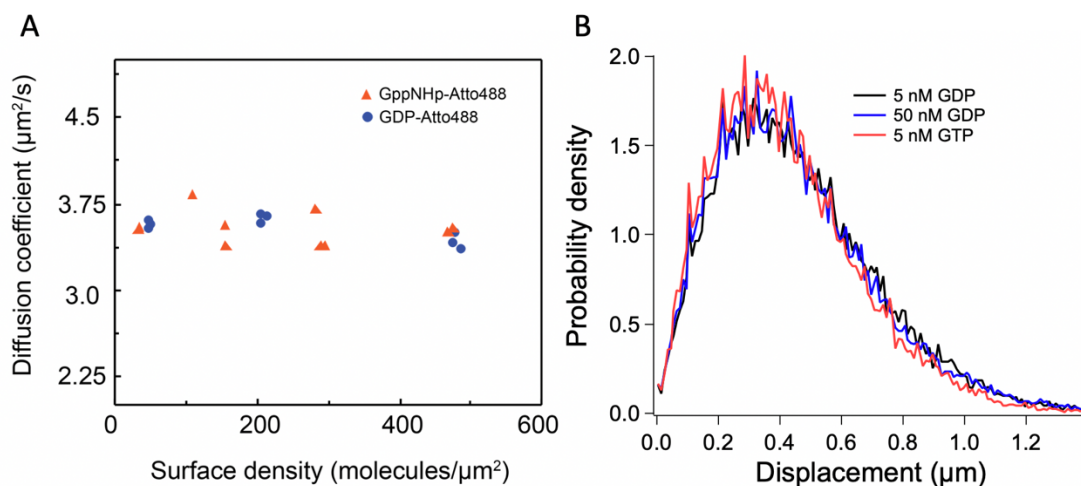

**Fig. S7.** Use of tags in the SLB experiments. (A) FCS diffusion measurements on 10% DOPS SLBs for native full-length KRas4B labeled with Atto488-GDP or -GppNHp in 10 mM BME to reduce photo-induced crosslinking reactions. (B) Single molecule tracking step size distribution on PIP<sub>2</sub> bilayers (overall charge -10%) for low (incubation concentration 5 nM, expected surface density  $\sim 100 \mu\text{m}^{-2}$ ) and high (incubation concentration 50 nM, expected surface density  $\sim 1000 \mu\text{m}^{-2}$ ) surface densities. KRas4B were tracked by Alexa647-GDP or -GppNHp in oxygen scavenger buffers. There are no surface-density dependent changes in diffusion for both FCS and SMT, indicating monomeric behavior for full-length K-Ras lacking eGFP labels.



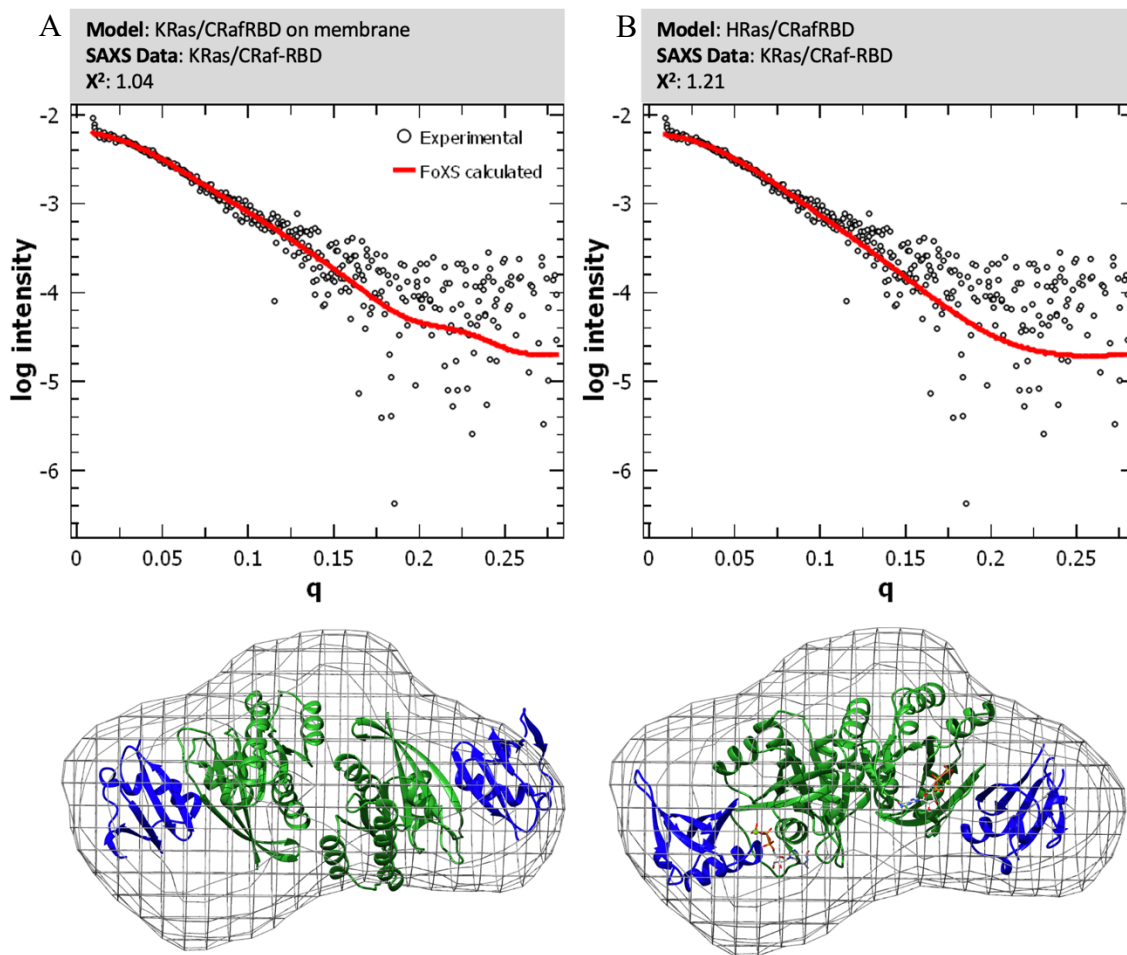

**Fig. S8.** Quantitative analysis of KRas/CRAF-RBD and HRas/CRAF-RBD dimer models against SAXS data using FoXS (3). The same SAXS data were used as for Fig. S5. (A) The KRas/CRAF-RBD dimer model was generated from the average structure resulting from 1  $\mu$ s simulation of the full-length lipidated KRas in complex with CRAf-RBD on the membrane, with KRas truncated at residue 166 to match the Ras construct used for SAXS data collection. (B) The HRas/CRAF-RBD dimer model was generated from the average structure of the 90 ns simulation of the crystallographic dimer (PDB ID 4G0N). The resulting  $\chi^2$  values for both dimer models to the SAXS data indicate excellent fit for both models ( $\chi^2$  values < 1.5).

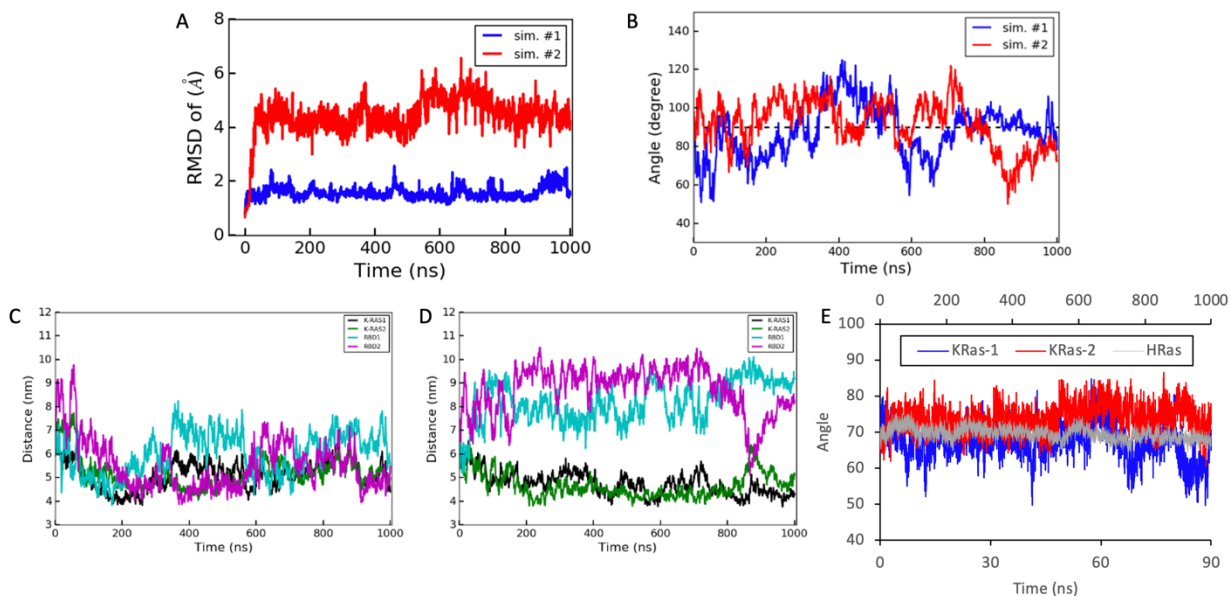

**Fig. S9.** Properties of the 1  $\mu$ s simulations of the KRas/Raf-RBD dimer on the membrane. (A) Root mean square deviation (RMSD) from the starting model of the KRas/Raf-RBD dimer throughout the two simulations. (B) Angle of the KRas/KRas dimer relative to the membrane in the presence of Raf-RBD. The angle is measured between a vector normal to the membrane and a vector connecting the centers of the two KRas catalytic domains. A dashed line indicates  $90^\circ$ , with the Ras helices perpendicular to the plane of the membrane. (C) and (D) show the distance from the center of mass of each component of the KRas/Raf-RBD dimer to the membrane center over the course of the first and second simulations, respectively. (E) Angle between helices 4 and 5 across the dimer interface for 90 ns of the two simulations with KRas (KRas-1 blue, KRas-2 red) compared to the 90 ns simulation with HRas (gray).

The angle between helices 4 and 5 across the dimer interface (shown in E) was defined as that between the vectors connecting the center of mass calculated for residues at the two ends of the dimer interface helices in each Ras protomer. At the end furthest from the membrane, the center of mass was calculated from helix 4 residues 127, 128, 129, 130 and helix 5 residues 152, 153, 154, 155. At the end closest to the membrane helix 4 residues 134, 135, 136, 137 and helix 5 residues 163, 164, 165, 166 were used. The average angle sampled by each isoform differs by less than  $10^\circ$ . However, the KRas angle fluctuates in the range of  $20\text{-}30^\circ$  around the average, while the angle in HRas stays within  $10^\circ$  of the average.

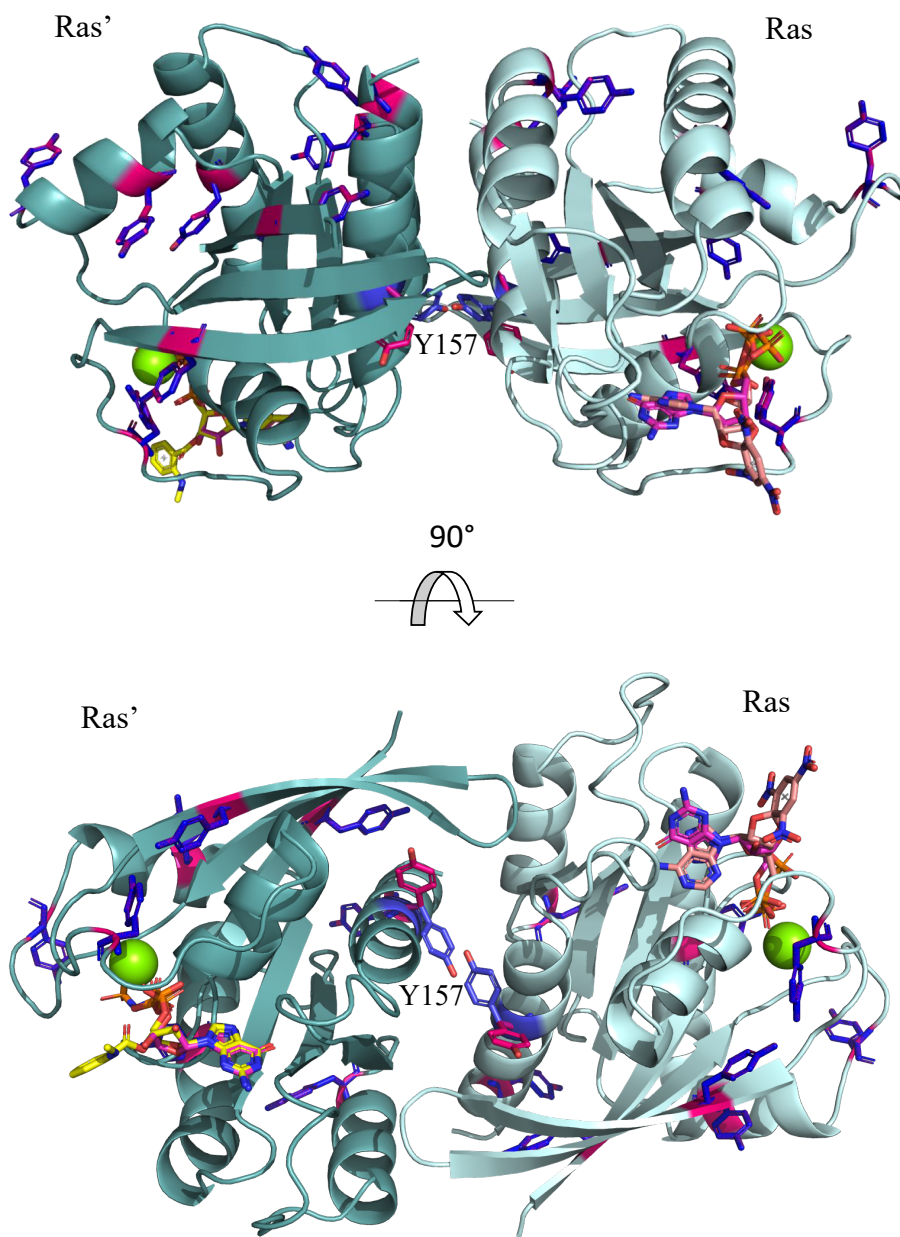

**Fig. S10.** The distribution of tyrosine residues on Ras. The figure shows two orientations of the NRas dimer constructed as described by Guldenhaupt et al (2012) (7), with all tyrosine residues explicitly shown in blue. These tyrosine residues are mostly surface-exposed and could form reactive oxygen radicals upon excitation with light, resulting in crosslinking between two Ras molecules to form a covalent dimer. Several combinations of Ras surface tyrosine residues, could form dimers. One interesting example is Tyrosine 157, labeled in the figure (after a simple rotation around  $\chi_1$ , shown in blue, with the original position in pink), which if crosslinked with its counterpart on a second Ras molecule would result in the crosslinked dimer with the  $\alpha$ 4- $\alpha$ 5 interface.

## SI References

1. D. P. Donnelly *et al.*, Best practices and benchmarks for intact protein analysis for top-down mass spectrometry. *Nat Methods* **16**, 587-594 (2019).
2. J. B. Hopkins, R. E. Gillilan, S. Skou, BioXTAS RAW: improvements to a free open-source program for small-angle X-ray scattering data reduction and analysis. *J Appl Crystallogr* **50**, 1545-1553 (2017).
3. D. Schneidman-Duhovny, M. Hammel, J. A. Tainer, A. Sali, FoXS, FoXSDock and MultiFoXS: Single-state and multi-state structural modeling of proteins and their complexes based on SAXS profiles. *Nucleic Acids Res* **44**, W424-429 (2016).
4. K. Y. Lee *et al.*, Two Distinct Structures of Membrane-associated Homodimers of GTP- and GDP-bound KRAS4B Revealed by Paramagnetic Relaxation Enhancement. *Angew Chem Int Ed Engl* 10.1002/anie.202001758 (2020).
5. W. Humphrey, A. Dalke, K. Schulten, VMD: visual molecular dynamics. *J Mol Graph* **14**, 33-38, 27-38 (1996).
6. C. Ambrogio *et al.*, KRAS Dimerization Impacts MEK Inhibitor Sensitivity and Oncogenic Activity of Mutant KRAS. *Cell* 10.1016/j.cell.2017.12.020 (2018).
7. J. Guldenhaupt *et al.*, N-Ras forms dimers at POPC membranes. *Biophys J* **103**, 1585-1593 (2012).
